# Supplementary material for: GLUT3 is induced during epithelial-mesenchymal transition and promotes tumor cell proliferation in non-small cell lung cancer
Source: PubMed Central journal article supplement (PMC4122054; doi:10.1186/2049-3002-2-11), 2014-07-29

**A**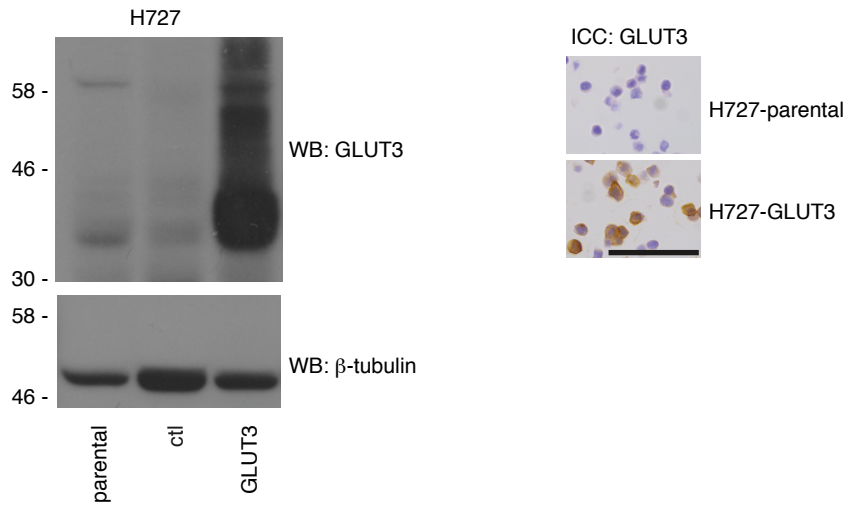**B**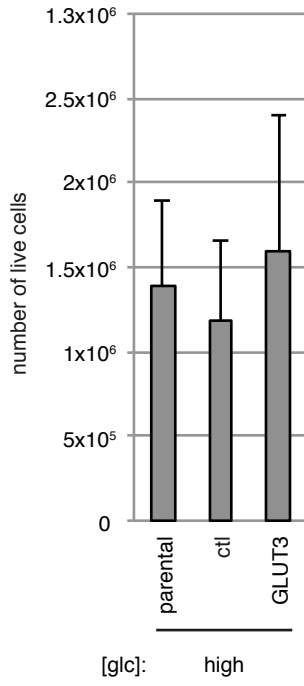

Supplement: 2049-3002-2-11-S7.pdf [file 2049-3002-2-11-S7.pdf]
